# Supplementary material
Source: HighWire-hosted journal article supplement (https://www.cmajopen.ca/highwire/filestream/81003/field_highwire_adjunct_files/0/open-2016-0100-1-at.pdf)
Supplement: open-2016-0100-1-at.pdf [file open-2016-0100-1-at.pdf]

**Appendix 1 (as supplied by the authors): Cumulative incidence of first treatment for EOC patients presenting in the ER or elsewhere (Non-ER)**

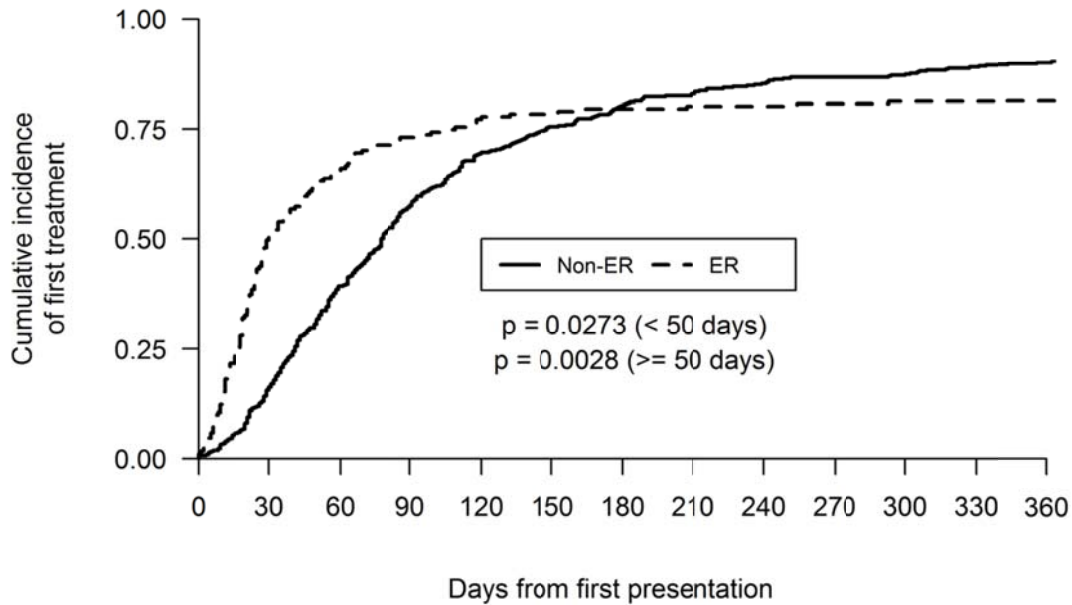

Incidence of first treatment (date of first chemotherapy dose, or date of surgery) was measured over time (days) from point of presentation. Similar to incidence of GynOnc encounter, patients presenting in the ER initiated treatment sooner than those presenting elsewhere.
